# Supplementary material for: Endometrial PTEN Deficiency Leads to SMAD2/3 Nuclear Translocation
Source: MDPI journal article supplement (doi:10.3390/cancers13194990), 2021-10-05
Supplement: s1 [file s1]

# Supplementary Material: Endometrial PTEN Deficiency Leads to Tumor Suppressive SMAD2/3 Nuclear Translocation

Nuria Eritja, Raul Navaridas, Anna Ruiz-Mitjana, Maria Vidal-Sabanes, Joaquim Egea, Mario Encinas, Xavier Matias-Guiu and Xavi Dolcet

A

| Cre:ER+/-;Pten fl/fl | Relative fold increase of Phospho-SMAD2/3 (Total SMAD2/3) | SEM    | p-value |
|----------------------|-----------------------------------------------------------|--------|---------|
| NO TAM               | 1.0011                                                    | 0.1605 | 0.956   |
| TAM                  | 1.0454                                                    | 0.07   |         |

  

| Cre:ER+/-;Pten fl/fl | Relative fold increase of Total SMAD2/3 (Tubulin) | SEM     | p-value |
|----------------------|---------------------------------------------------|---------|---------|
| NO TAM               | 1.0001                                            | 0.0992  | * 0.027 |
| TAM                  | 2.575                                             | 0.04625 |         |

  

| Cre:ER+/-;Pten fl/fl | Relative fold increase of Phospho-SMAD2/3 (Tubulin) | SEM     | p-value  |
|----------------------|-----------------------------------------------------|---------|----------|
| NO TAM               | 0.99950                                             | 0.0992  | ** 0.009 |
| TAM                  | 2.7425                                              | 0.04625 |          |

T-test (Mann-Whitney test)

B

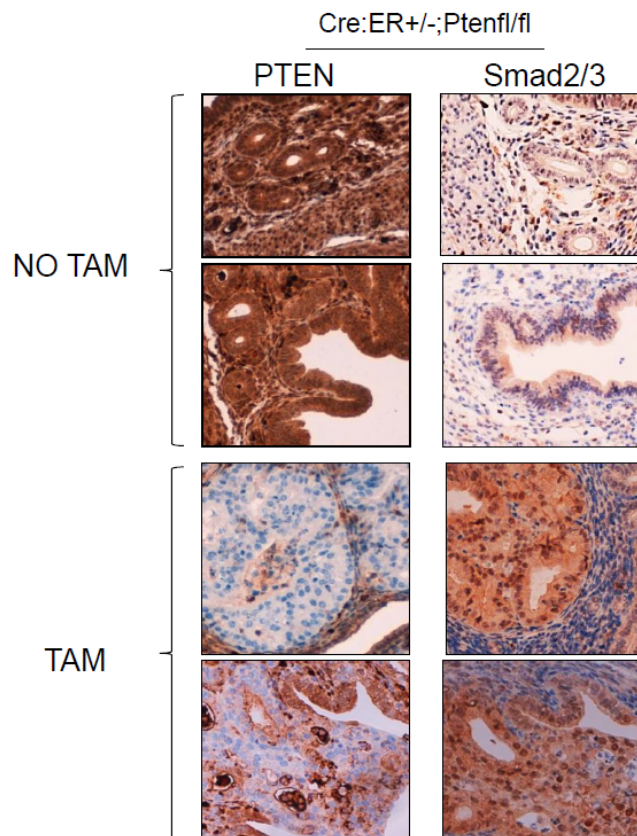

**Figure S1.** PTEN deletion induces Smad2/3 expression and nuclear translocation of Smad2/3 in vivo. **(A)** Densitometry quantification and statistical analysis corresponding to western blot shown in Figure 5A. Values are mean  $\pm$  s.e.m. \*  $p < 0.05$  and \*\*  $p < 0.01$ , by t-test analysis. **(B)** PTEN and Smad2/3

immunohistochemistry on formalin-fixed paraffin-embedded endometrial tissue sections from 12-week-old Cre:ER+/-; Pten fl/fl mice that have been injected (TAM) or not (NO TAM) with tamoxifen to induce PTEN deletion (4 weeks).

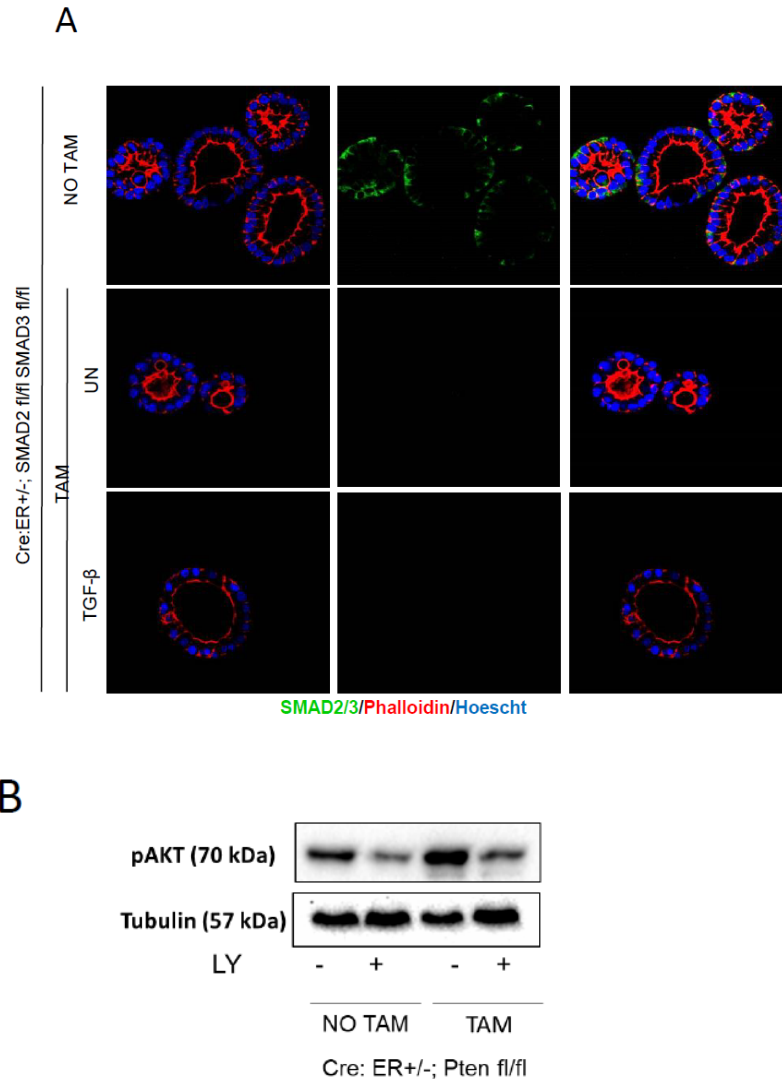

**Figure S2. (A)** Deletion of SMAD2/3 demonstrates the specificity of SMAD2/3 immunofluorescence. SMAD2/3 Immunofluorescence of organoid cultures from Cre:ER+/-; SMAD2fl/flSMAD3fl/fl mice treated or not with Tamoxifen (TAM) to induce deletion of floxed alleles. Tamoxifen treated cultures were also stimulated with 10ng/ml of TGF-β for 1 h or left untreated (UN). Cells were also stained with phalloidin to evidence actin cytoskeleton and glandular morphology. Nuclei were counter-stained with Hoechst. **(B)** Western blot analysis of p-AKT on lysates from Cre:ER+/-; Ptenfl/fl organoid cultures treated (TAM) or not (NOTAM) with tamoxifen and treated with (+) or without (-) 10μM LY294002(LY).

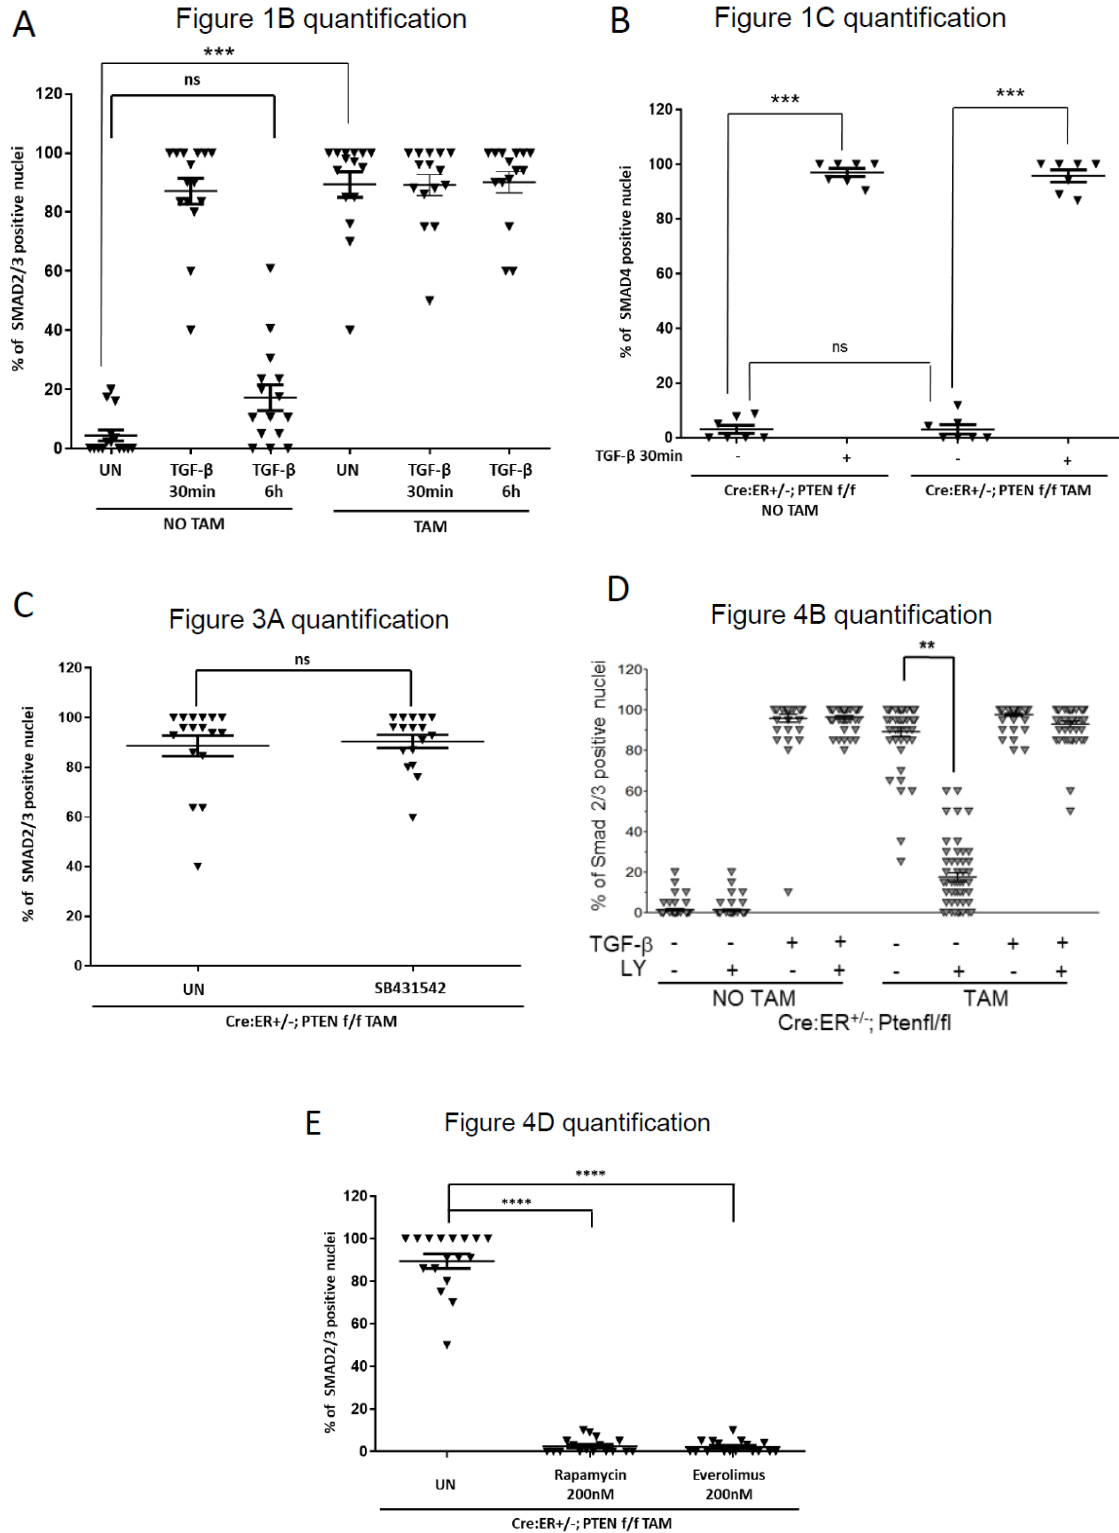

**Figure S3:** Quantification of nuclear localization of SMAD2/3 or SMAD4 corresponding to the indicated Figures. Experiments were performed three independent times (each with  $n = 30$  total cells per gland counted per condition). Asterisks denote statistically significant differences between conditions. \*\*\*  $p \leq 0.01$  (one-way ANOVA Tukey's multiple comparison test).

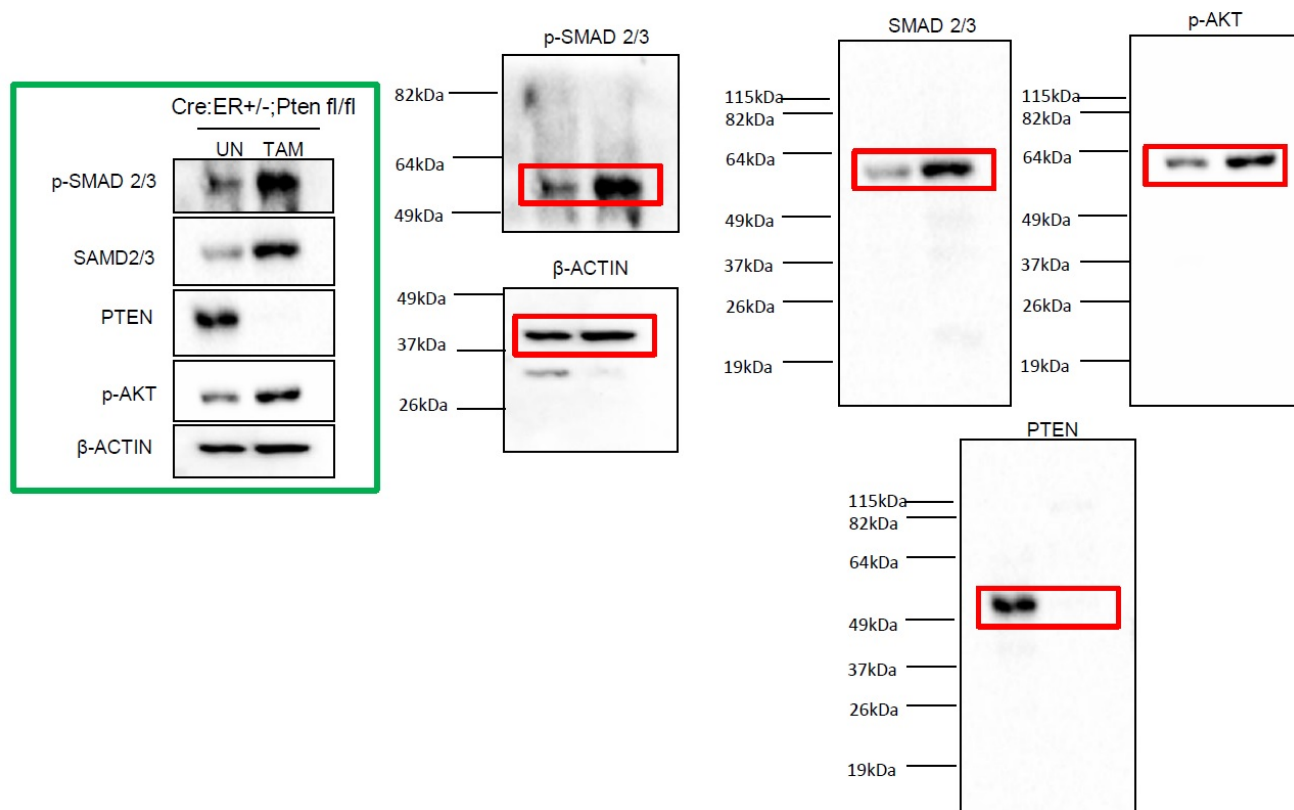

Figure S4. Uncropped Figure 1A.

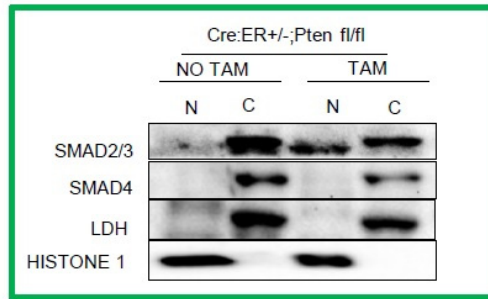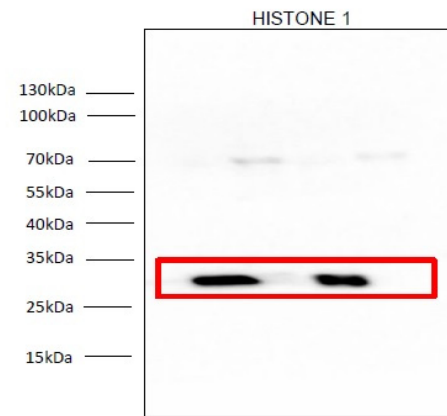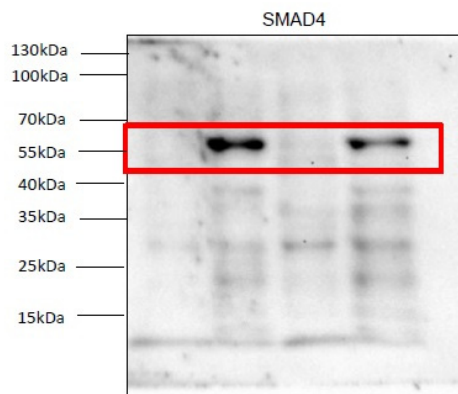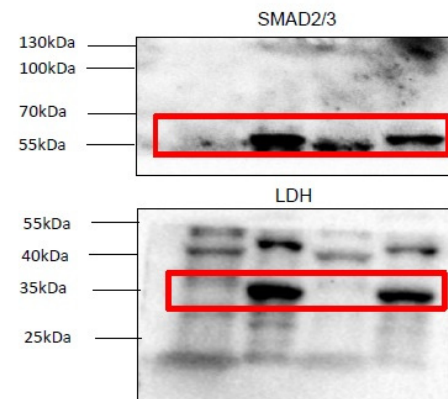

Figure S5. Uncropped Figure 1D.
